# Supplementary material for: Gut microbiota of white-headed black langurs (Trachypithecus leucocephalus) in responses to habitat fragmentation
Source: Front Microbiol. 2023 Feb 13;14:1126257. doi: 10.3389/fmicb.2023.1126257 (PMC9968942; doi:10.3389/fmicb.2023.1126257)
Supplement: Supplementary file 4 [file Table_2.XLSX]

## Sheet: Sample informations
Sequence information of all samples
Sample	Sequences	Base	Mean length	Min length	Max length
BL021	52371	21347894	408	245	432
BL022	43931	17943200	408	216	432
BL023	78021	31801925	408	216	466
BL024	31274	12734146	407	248	513
BL025	42603	17336762	407	233	431
BL026	41664	16964774	407	269	435
BL027	37847	15376022	406	242	430
BL028	48306	19770708	409	232	432
BL029	33619	13704583	408	248	519
BL030	36688	14946653	407	236	432
BL031	45188	18384429	407	232	432
BL032	46948	19104683	407	248	431
BL033	49065	19965471	407	246	442
BL034	41965	17043248	406	300	432
BL035	41011	16686973	407	248	431
BL036	46141	19016080	412	248	441
BL037	42462	17283279	407	230	441
BL038	43929	17866141	407	256	445
BL039	41762	16952024	406	280	431
BL040	45231	18389978	407	246	431
BL053	50310	20530598	408	247	469
BL054	41735	17030629	408	250	431
BL055	40790	16595578	407	248	432
BL056	34924	14262464	408	211	431
BL057	36053	14758259	409	284	432
BL058	38167	15635869	410	235	431
BL059	47675	19401808	407	215	436
BL060	43881	17876173	407	224	431
BL061	45914	18705763	407	245	431
BL062	45348	18434933	407	235	431
BL063	43339	18137405	419	261	458
BL064	40703	16540931	406	245	461
BL065	40598	16536449	407	261	431
BL066	41763	16991783	407	262	515
BL067	45336	18491198	408	248	431
BL068	45712	18609923	407	262	431
BL069	44442	18073817	407	262	432
BL070	46373	18854571	407	320	431
BL071	34110	13853737	406	354	430
BL072	39940	16236079	407	246	430
BL073	31951	12981469	406	310	512
BL074	38550	15691320	407	280	431
BL075	36757	14943889	407	232	431
BL089	38814	15871922	409	216	444
BL090	39984	16266644	407	232	522
BL091	39199	16085363	410	235	432
BL092	39704	16156805	407	284	445
BL093	43380	17689007	408	232	431
BL094	43180	17619205	408	263	432
BL095	36467	14829909	407	249	440
BL096	42094	17151326	407	245	431
BL097	43700	17768756	407	216	431
BL098	38106	15504652	407	214	447
BL099	41568	16922931	407	248	431
BL100	34955	14198181	406	262	445
BL113	42512	17347333	408	228	445
BL114	44130	17964489	407	235	489
BL115	36050	14644778	406	261	432
BL116	34082	13850154	406	245	431
BL117	32856	13356318	407	223	431
BL118	38995	15948757	409	313	433
BL119	34318	13938563	406	319	431
BL120	34029	13862503	407	213	431
BL121	35301	14337444	406	231	430
BL122	37024	15040809	406	235	431
BL123	32963	13415381	407	229	431
BL124	37679	15304463	406	248	442
BL276	59098	24108179	408	235	516
BL277	48783	19901632	408	287	453
BL278	57728	23541802	408	229	431
BL279	52150	21294931	408	254	434
BL280	57593	23477725	408	219	432
BL281	53470	21819969	408	252	432
BL282	62909	25620315	407	344	431
BL283	53121	21679857	408	252	455
BL284	69599	28455340	409	245	521
BL285	59094	24057806	407	254	430
BL286	67273	27469623	408	220	441
BL287	55288	22532165	408	232	440
BL288	60858	24786260	407	221	441
BL289	79919	32602606	408	226	431
BL290	59773	24324361	407	246	430
BL291	56199	22978960	409	277	493
BL292	58461	23805103	407	262	430
BL293	48495	19741549	407	221	431
BL294	51049	20886692	409	239	430
BL295	52081	21181643	407	324	430
BL296	49209	20051733	407	202	431
BL297	46706	19006894	407	224	430
BL298	54935	22376452	407	252	430
BL299	64835	26465919	408	222	431
BL300	53896	21998982	408	262	430
BL301	48834	19908000	408	277	476
BL302	62487	25523523	408	250	430
BL303	49483	20156566	407	224	430
BL304	59089	24088461	408	248	449
BL305	51177	21148159	413	237	503
BL306	53833	21914775	407	204	455
BL307	53134	21633988	407	363	431
BL308	45933	18749195	408	233	442
BL309	56161	22859809	407	252	452
BL310	61791	25279383	409	245	503
BL311	67341	27391653	407	252	430
BL312	55133	22423857	407	251	430
BL313	56353	23109509	410	388	512
BL314	66370	27148548	409	338	431
BL315	63242	25786802	408	270	430
BL316	57917	23568769	407	219	430
BL317	56708	23229593	410	252	431
BL318	62393	25383074	407	293	464
BL331	67247	27450811	408	252	432
BL332	46297	18879819	408	255	431
BL333	56153	22981060	409	203	453
BL334	74390	30355843	408	252	499
BL335	60572	24750320	409	230	430
BL336	68325	27858273	408	259	472
BL337	66678	27252044	409	252	443
BL338	62371	25467782	408	210	464
BL339	58814	24001690	408	252	431
BL340	56975	23337923	410	252	443
BL341	60542	24734294	409	245	431
BL342	56855	23179307	408	297	430
BL343	62734	25630107	409	247	431
BL344	55543	22646281	408	201	431
BL345	66516	27149701	408	230	431
BL346	66500	27092296	407	299	431
BL359	73778	30100411	408	278	467
BL360	61184	24982643	408	224	430
BL361	73426	29918257	407	248	431
BL362	66491	27182526	409	245	459
BL363	71042	28952587	408	236	431
BL364	72842	29691730	408	228	490
BL365	62924	25741553	409	267	431
BL366	71516	29603278	414	337	498
BL367	68963	28095270	407	233	456
BL368	81251	33159994	408	211	432
BL369	76074	31103280	409	252	436
BL370	66539	27133055	408	227	431
BL371	86352	35172133	407	213	488
BL372	56621	23069826	407	337	454
BL373	70309	28668982	408	252	431
BL374	69334	28357090	409	222	519
BL375	59870	24512958	409	247	431
BL376	62209	25463045	409	251	448
BL377	57733	23545665	408	213	430
BL378	64909	26454636	408	204	431
BL379	56162	22945963	409	205	432
BL380	57985	23728452	409	345	432
BL381	63930	26051407	407	255	431
BL382	75589	30810635	408	233	431
BL383	69514	28365152	408	254	502
BL384	57240	23326071	408	252	432
BL385	60596	24743371	408	401	472
BL386	56968	23299306	409	277	436
BL387	66826	27365774	410	240	466
BP001	70945	29057992	410	232	442
BP002	71625	29617852	414	252	443
BP003	64707	26683910	412	270	475
BP004	55549	23019685	414	255	477
BP005	58616	24184903	413	232	438
BP006	71713	29372006	410	292	431
BP007	77899	32240986	414	232	430
BP008	79515	32605960	410	235	511
BP009	54861	22359613	408	297	430
BP010	51994	21188387	408	214	511
BP011	58102	23778521	409	319	445
BP012	50529	20600794	408	254	453
BP013	53116	21649046	408	229	431
BP014	68274	27867358	408	214	448
BP015	47837	19635384	410	222	437
BP016	54393	22218261	408	207	431
BP017	68376	28104027	411	216	431
BP018	65111	26586923	408	235	493
BP019	48373	19784308	409	232	453
BP020	55536	22755054	410	239	508
BP021	67192	27470418	409	254	447
BP022	73202	30047019	410	253	449
BP023	87958	36067525	410	231	431
BP024	86234	35236141	409	232	512
BP025	79656	32535502	408	261	471
BP026	77234	31567461	409	215	438
BP027	58173	23755998	408	248	431
BP028	82533	33807893	410	297	469
BP029	67588	27636544	409	232	432
BP030	58470	23970611	410	219	443
BP031	50275	21069518	419	237	432
BP032	75101	30910214	412	254	456
BP033	78003	32043707	411	204	466
BP034	58993	24126616	409	248	431
BP035	53308	21824143	409	237	519
BP036	46230	18927201	409	255	523
BP037	60570	24882514	411	342	491
BP038	68834	28183233	409	252	524
BP039	66916	27428588	410	255	502
BP040	61037	24922908	408	252	488
BP041	49603	20243987	408	220	430
BP042	72425	29828836	412	239	451
BP043	77162	31628096	410	252	443
BP044	82332	33714816	409	246	465
BP045	66911	27344302	409	206	431
BP046	83181	34115279	410	248	460
BP047	57247	23481993	410	221	449
BP048	68077	27940928	410	252	522
Sum	11291593	4612675035	82895	50792	91124
Mean ± SD	55624 ± 13334	22722537 ± 5480922	408 ± 2	250 ± 34	449 ± 27
