# Supplementary material for: Gut microbiota of white-headed black langurs (Trachypithecus leucocephalus) in responses to habitat fragmentation
Source: Front Microbiol. 2023 Feb 13;14:1126257. doi: 10.3389/fmicb.2023.1126257 (PMC9968942; doi:10.3389/fmicb.2023.1126257)
Supplement: Supplementary file 5 [file Table_3.XLSX]

## Sheet: Alpha diversity indices
Alpha diversity indices of gut microbiota for each sample
Sample	Shannon	invSimpson	ACE	Chao	Coverage
BL021	4.849	49.651	786.627	771.263	0.9934
BL022	4.538	40.869	629.053	639.1	0.995
BL023	4.57	39.483	623.383	645.75	0.9949
BL024	4.151	22.487	788.271	812.63	0.9921
BL025	4.867	59.836	724.096	722.6	0.9942
BL026	4.829	59.905	718.825	738	0.994
BL027	2.643	5.141	350.854	377.69	0.9968
BL028	4.878	66.968	799.596	750.6	0.994
BL029	4.285	27.702	703.103	686.48	0.9939
BL030	4.407	38.212	736.974	711.619	0.9935
BL031	4.735	43.032	729.435	728.538	0.9943
BL032	4.78	42.453	705.611	709.69	0.9945
BL033	4.735	44.225	693.108	719.78	0.9943
BL034	4.705	47.256	687.27	680.222	0.9946
BL035	4.772	48.949	678.351	661.875	0.9946
BL036	5.013	45.825	1157.09	1178.02	0.9893
BL037	4.666	51.375	645.187	660.051	0.995
BL038	4.63	34.97	661.716	663.743	0.9947
BL039	4.151	21.986	550.537	548.179	0.9953
BL040	4.844	51.107	820.372	845.88	0.993
BL053	4.621	37.006	773.5	784.195	0.9931
BL054	4.823	41.302	1032.41	1043.71	0.9902
BL055	4.696	44.416	893.038	878.71	0.9915
BL056	4.632	37.918	696.739	702.764	0.9942
BL057	4.612	33.383	724.917	771.288	0.9939
BL058	4.114	18.129	776.96	784.28	0.9923
BL059	4.693	37.892	741.579	800.909	0.9935
BL060	4.486	27.797	684.022	692.412	0.9944
BL061	4.445	28.664	736.399	768.231	0.9935
BL062	4.644	37.703	746.065	744.139	0.9936
BL063	3.086	4.514	942.155	813.788	0.9915
BL064	4.62	39.508	661.881	680.475	0.9946
BL065	4.684	42.824	685.072	692.047	0.9946
BL066	4.624	37.13	703.639	767.078	0.9938
BL067	4.523	35.451	639.886	672.654	0.9947
BL068	4.794	48.033	745.591	775.443	0.9938
BL069	4.717	41.41	734.253	753.087	0.9942
BL070	4.78	49.57	710.481	725	0.9945
BL071	4.204	24.986	575.448	565.258	0.9952
BL072	4.753	45.212	703.243	724.35	0.9945
BL073	4.433	32.142	606.462	598.354	0.9951
BL074	4.543	39.82	635.529	635.354	0.9951
BL075	4.54	36.475	713.155	700.916	0.9939
BL089	4.411	21.028	769.879	764.161	0.9935
BL090	4.866	58.859	719.25	736.507	0.9942
BL091	4.909	47.863	913.47	946.325	0.9918
BL092	4.955	76.868	698.99	724.638	0.9942
BL093	4.889	55.174	837.823	874.986	0.9925
BL094	5.071	88.392	782.44	776.688	0.9935
BL095	4.783	47.21	777.763	787.197	0.9932
BL096	4.722	43.613	747.167	735.523	0.994
BL097	4.549	45.601	655.631	673.452	0.9943
BL098	4.897	57.667	705.874	711.208	0.9947
BL099	4.69	42.495	740.698	769.338	0.9935
BL100	3.933	12.822	506.312	516.064	0.996
BL113	5.049	59.021	897.745	897.424	0.9923
BL114	4.751	32.231	979.649	1017	0.9907
BL115	3.977	13.526	707.753	723.281	0.9936
BL116	3.617	9.775	732.233	744.533	0.9927
BL117	4.485	31.241	814.207	830.329	0.9925
BL118	5.329	84.53	1109.74	1125.05	0.9904
BL119	4.716	46.916	642.11	679.958	0.995
BL120	5.007	65.285	753.455	746.361	0.9942
BL121	4.663	42.898	694.081	704.309	0.9944
BL122	4.559	38.401	700.523	720.983	0.9941
BL123	4.693	46.086	718.187	722.213	0.9941
BL124	4.271	17.905	685.989	700.85	0.994
BL276	4.844	62.046	675.762	683.017	0.9948
BL277	5.243	64.838	1221.46	1212.07	0.9885
BL278	4.829	55.354	672.648	689.833	0.9946
BL279	4.98	73.103	610.488	628.02	0.9958
BL280	4.653	47.384	653.721	658.156	0.9947
BL281	5.045	67.773	912.362	941.623	0.9917
BL282	4.708	45.483	630.503	637.092	0.9951
BL283	4.83	53.345	647.974	661	0.995
BL284	4.827	53.703	766.32	748	0.9932
BL285	4.723	43.473	763.468	815.965	0.9931
BL286	5.162	82.707	946.314	988.43	0.9916
BL287	4.827	42.953	949.74	951.857	0.991
BL288	4.995	76.301	627.765	657.733	0.9956
BL289	4.929	60.559	794.18	795.083	0.9932
BL290	4.841	51.99	654.454	688.122	0.995
BL291	4.856	56.378	719.477	729.859	0.994
BL292	4.817	51.007	687.634	707.889	0.9944
BL293	4.763	36.957	624.51	617.389	0.9956
BL294	4.863	67.868	642.663	667.784	0.995
BL295	4.596	39.603	604.879	651.25	0.9953
BL296	4.739	41.82	655.301	666.107	0.995
BL297	4.701	48.475	641.393	671.06	0.9949
BL298	5.056	71.95	779.047	781.014	0.9938
BL299	4.99	70.872	771.92	831.818	0.9933
BL300	4.812	46.371	651.574	679.353	0.9948
BL301	4.882	70.17	565.877	554.103	0.9964
BL302	4.836	48.437	689.78	683.313	0.9945
BL303	4.673	41.747	633.243	635.468	0.9954
BL304	5.278	93.731	914.152	954.658	0.9923
BL305	4.998	44.587	1039.15	1054.19	0.9904
BL306	5.035	87.703	734.533	747.125	0.9938
BL307	4.881	54.372	1408.21	1225.86	0.9879
BL308	5.322	94.104	1364.26	1357.41	0.9863
BL309	4.914	54.46	1541.59	1284.73	0.9867
BL310	5.101	65.826	1359.85	1322.03	0.9865
BL311	5.088	95.671	780.098	816.22	0.9932
BL312	5.019	88.919	700.315	723.276	0.9941
BL313	5.184	79.684	1301.65	1142.67	0.9888
BL314	5.444	105.005	1212.2	1215.63	0.9888
BL315	4.91	59.679	844.108	854	0.9925
BL316	5.16	100.774	892.512	849.057	0.993
BL317	5.317	103.681	1149.34	1191.03	0.9888
BL318	5.174	98.692	1047.46	951.859	0.9913
BL331	5.289	98.17	723.12	755.185	0.9951
BL332	5.155	90.236	666.842	668.443	0.9956
BL333	5.207	75.956	709.984	713.727	0.9955
BL334	4.842	43.734	645.289	660.019	0.9953
BL335	4.896	57.573	695.168	720.5	0.9948
BL336	4.875	50.662	645.282	677.622	0.9951
BL337	5.093	72.873	738.484	757.246	0.9945
BL338	5.164	82.859	820.667	840.389	0.9935
BL339	4.831	57.815	641.359	645.045	0.9956
BL340	4.825	62.767	831.67	818.481	0.9923
BL341	5.042	62.628	831.104	862.88	0.993
BL342	4.965	66.349	695.486	755.696	0.9945
BL343	5.042	64.356	744.7	770.345	0.9943
BL344	5.096	73.544	707.695	711.836	0.995
BL345	5.123	67.77	1003.33	1009.1	0.991
BL346	4.952	70.381	646.095	632.13	0.9955
BL359	5.011	68.399	725.726	733.726	0.9942
BL360	5.02	66.042	645.294	634.338	0.9961
BL361	5.09	78.616	732.747	725.667	0.9944
BL362	4.818	54.234	700.552	720.054	0.9944
BL363	5.226	92.339	1111.7	1056.38	0.9909
BL364	5.13	83.467	766.404	790.678	0.9939
BL365	5.06	74.228	733.266	740.234	0.9942
BL366	4.492	31.308	519.069	518.023	0.9963
BL367	5.168	94.061	723.85	741.517	0.9942
BL368	5.206	90.835	686.172	705.019	0.9954
BL369	5.015	67.387	658.826	664.78	0.9955
BL370	5.166	89.918	840.48	819.563	0.9932
BL371	5.085	79.184	720.024	747.889	0.9944
BL372	5.128	81.56	630.885	624.667	0.9963
BL373	5.018	73.464	772.37	792.623	0.9934
BL374	5.013	74.96	672.904	683.279	0.9953
BL375	5.009	77.382	642.708	658.283	0.9956
BL376	5.043	80.883	697.794	743	0.9946
BL377	5.134	91.46	614.268	618.278	0.9963
BL378	5.139	85.836	631.553	648.438	0.9961
BL379	5.138	83.043	764.009	746.213	0.9941
BL380	5.04	71.918	1115.93	1033.5	0.9907
BL381	5.107	87.608	645.897	679.333	0.9955
BL382	5.031	76.575	939.692	839.4	0.9927
BL383	5.128	89.472	655.059	674.02	0.9955
BL384	5.099	89.22	676.366	710.163	0.9948
BL385	5.116	76.544	1102.84	1120.4	0.9893
BL386	5.143	75.602	1569.32	1394.53	0.9862
BL387	5.361	93.282	1540.62	1540.17	0.984
BP001	4.928	53.666	730.558	763.467	0.9945
BP002	4.609	43.94	583.89	590.278	0.9956
BP003	4.666	48.265	535.001	534.667	0.9963
BP004	4.476	42.923	517.371	543.5	0.9961
BP005	4.669	52.369	507.846	512.271	0.9968
BP006	4.696	43.056	599.482	601.625	0.9957
BP007	4.495	38.611	583.166	625.357	0.9952
BP008	5.124	85.999	1098.13	905.11	0.9916
BP009	5.112	79.847	760.409	735.197	0.9937
BP010	5.004	73.32	657.488	643	0.9949
BP011	4.964	67.585	616.563	622.059	0.9957
BP012	5.117	95.243	840.505	753.222	0.994
BP013	5.108	91.045	1138.64	957.508	0.9913
BP014	4.902	62.787	603.608	610.204	0.9956
BP015	5.004	74.863	1120.69	1210.32	0.9884
BP016	5.051	72.106	1199.14	1108.94	0.9896
BP017	5.146	74.885	1397.51	1218.67	0.9878
BP018	5.166	84.983	744.116	751.254	0.9948
BP019	4.645	44.941	774.999	773.164	0.9928
BP020	4.91	53.437	1092.75	1072.12	0.9894
BP021	5.136	66.92	650.105	672	0.996
BP022	5.065	83.059	707.55	740.519	0.9946
BP023	4.999	64.939	674.31	702.4	0.995
BP024	5.134	78.395	629.422	640.353	0.9964
BP025	5.196	81.484	657.545	667.519	0.996
BP026	4.991	64.099	695.736	705.242	0.9949
BP027	5.104	86.599	691.069	694.615	0.995
BP028	5.214	90.433	782.865	778.743	0.9941
BP029	5.075	74.838	666.195	663.906	0.9956
BP030	4.944	69.976	651.132	650.971	0.9953
BP031	3.905	10.517	573.092	592.2	0.9955
BP032	5.027	78.203	629.021	647	0.9956
BP033	4.797	50.196	567.89	588.024	0.9964
BP034	5.306	113.911	720.369	752.865	0.9951
BP035	4.73	55.442	668.847	693.685	0.9944
BP036	4.689	51.724	645.914	631.933	0.995
BP037	5.093	68.43	687.203	703.179	0.9953
BP038	5.281	108.853	734.342	785.25	0.9948
BP039	5.338	117.391	748.917	768.909	0.9946
BP040	5.079	82.176	676.943	678.892	0.9953
BP041	5.098	76.982	715.981	737.25	0.995
BP042	4.822	49.662	610.856	614.915	0.9958
BP043	5.292	114.441	624.997	642	0.9963
BP044	5.246	109.186	628.082	667.25	0.9961
BP045	5.225	104.665	593.1	597.468	0.9968
BP046	5.222	103.287	634.036	670.135	0.996
BP047	5.248	106.187	606.643	609.878	0.9966
BP048	5.201	100.841	609.863	616.776	0.9965
Mean ± SD	4.860 ± 0.356	61.433 ± 23.667	765.484 ± 199.074	767.612 ± 176.883	99.38% ± 0.22%
